# Supplementary material
Source: MDPI journal article supplement (https://www.mdpi.com/1999-4907/13/2/338)
Supplement: s1 [file s1 › Supplementary Figure S1 and S2.pdf]

## Supplementary

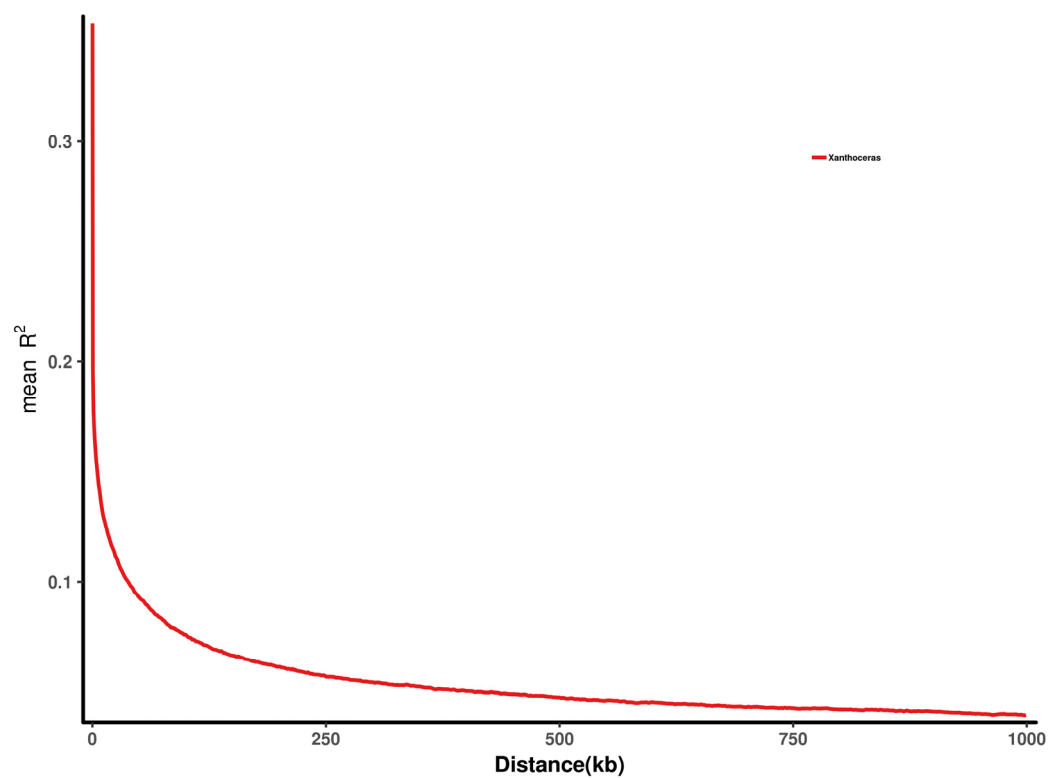

**Figure S1.** The relative kinship of 119 *X. sorbifolium* germplasms.

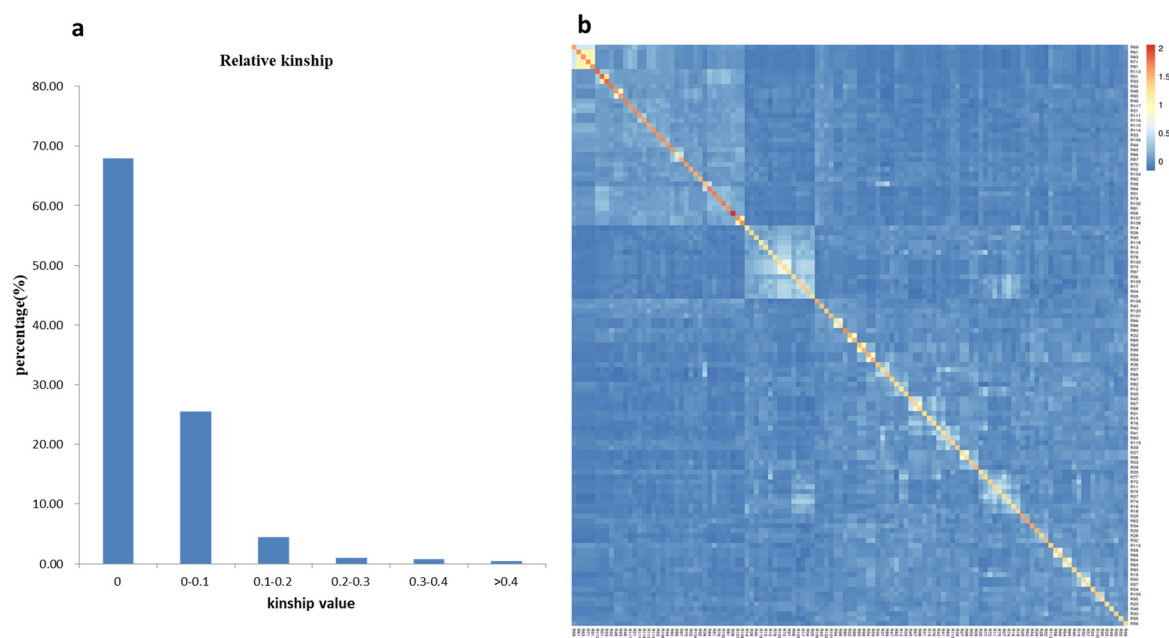

**Figure S2.** The attenuation curve of LD. The horizontal coordinate is the physical distance (kb) and the vertical coordinate is the LD factor ( $r^2$ ).
