# Supplementary material
Source: MDPI journal article supplement (https://www.mdpi.com/1999-4907/13/2/338)
Supplement: s1 [file s1 › Supplementary Table S1-S10.xlsx]

## Sheet: Table S1
Table S1 List of 119 elite germplasms of X.sorbifolium
Code	Accession No.	Accession Name	Resequencing No.	Group	Original
1	012	F-39	R01	BX	Fuxian, Shaanxi
2	013	JH013	R02	JH	Wuzhong, Ningxia
3	016	JH016	R03	JH	Wuzhong, Ningxia
4	018	JH018	R04	JH	Wuzhong, Ningxia
5	021	JF021	R05	JF	Wuzhong, Ningxia
6	022	JH022	R06	JH	Wuzhong, Ningxia
7	024	FH024	R07	FH	Wuzhong, Ningxia
8	025	HY025	R08	BX	Wuzhong, Ningxia
9	026	JH026	R09	JH	Wuzhong, Ningxia
10	028	FH028	R10	BX	Wuzhong, Ningxia
11	029	FH029	R11	FH	Wuzhong, Ningxia
12	030	HY030	R12	BX	Wuzhong, Ningxia
13	032	JZ032	R13	JH	Wuzhong, Ningxia
14	033	JH033	R14	JH	Wuzhong, Ningxia
15	039	FH039	R15	FH	Wuzhong, Ningxia
16	043	JH043	R16	JH	Wuzhong, Ningxia
17	044	JH044	R17	JH	Wuzhong, Ningxia
18	045	JH045	R18	JH	Wuzhong, Ningxia
19	046	BX046	R19	BX	Wuzhong, Ningxia
20	048	BX048	R20	BX	Wuzhong, Ningxia
21	050	FC050	R21	FH	Fuxian, Shaanxi
22	051	FH051	R22	FH	Yinchuan, Ningxia
23	052	FH052	R23	FH	Yinchuan, Ningxia
24	053	FH053	R24	FH	Yinchuan, Ningxia
25	054	FH054	R25	FH	Yinchuan, Ningxia
26	055	HF055	R26	TH	Yinchuan, Ningxia
27	056	FH056	R27	FH	Yinchuan, Ningxia
28	057	BX057	R28	BX	Yinchuan, Ningxia
29	058	JB058	R29	BX	Yinchuan, Ningxia
30	059	FH059	R30	FH	Yinchuan, Ningxia
31	060	FH060	R31	FH	Yinchuan, Ningxia
32	061	FH061	R32	FH	Yinchuan, Ningxia
33	062	FH062	R33	FH	Fuxian, Shaanxi
34	063	JB063	R34	FH	Yinchuan, Ningxia
35	064	HY064	R35	BX	Yinchuan, Ningxia
36	065	JF065	R36	JF	Yinchuan, Ningxia
37	066	JF066	R37	JF	Yinchuan, Ningxia
38	067	TH067	R38	TH	Yinchuan, Ningxia
39	068	CB068	R39	CB	Yinchuan, Ningxia
40	069	FH069	R40	BX	Yinchuan, Ningxia
41	070	FH070	R41	FH	Yinchuan, Ningxia
42	071	FH071	R42	FH	Yinchuan, Ningxia
43	072	FH072	R43	FH	Yinchuan, Ningxia
44	074	FC074	R44	FH	Lingbao, Henan
45	075	SXP01	R45	BX	Yinchuan, Ningxia
46	076	S1-1-1	R46	TH	Yinchuan, Ningxia
47	080	KKX	R47	FH	Huixian, Shandong
48	081	FH081	R48	FH	Yinchuan, Ningxia
49	082	6-A1-1	R49	FH	Yinchuan, Ningxia
50	083	F025	R50	BX	Fuxian, Shaanxi
51	084	F017	R51	BX	Fuxian, Shaanxi
52	085	F001	R52	BX	Fuxian, Shaanxi
53	086	F010	R53	BX	Fuxian, Shaanxi
54	087	F008	R54	BX	Fuxian, Shaanxi
55	088	F012	R55	FH	Fuxian, Shaanxi
56	089	F005	R56	BX	Fuxian, Shaanxi
57	090	F052	R57	BX	Fuxian, Shaanxi
58	091	F007	R58	BX	Fuxian, Shaanxi
59	092	F011	R59	BX	Fuxian, Shaanxi
60	093	F014	R60	BX	Fuxian, Shaanxi
61	094	F029	R61	BX	Fuxian, Shaanxi
62	095	F038	R62	BX	Fuxian, Shaanxi
63	096	F023	R63	BX	Fuxian, Shaanxi
64	097	F020	R64	BX	Fuxian, Shaanxi
65	098	F022	R65	BX	Fuxian, Shaanxi
66	099	F028	R66	BX	Fuxian, Shaanxi
67	100	N905	R67	BX	Minqin, Gansu
68	101	N901	R68	BX	Minqin, Gansu
69	102	Mg3	R69	FH	Chifeng, Inner Mongolia
70	103	Mg2	R70	BX	Chifeng, Inner Mongolia
71	104	Mg1	R71	BX	Chifeng, Inner Mongolia
72	105	N904	R72	BX	Minqin, Gansu
73	106	N916	R73	TH	Minqin, Gansu
74	107	N917	R74	BX	Minqin, Gansu
75	108	N920	R75	BX	Minqin, Gansu
76	109	N923	R76	FH	Minqin, Gansu
77	110	Smwgg	R77	BX	Minqin, Gansu
78	111	N934	R78	TH	Minqin, Gansu
79	112	Gs	R79	FH	Taiyuan, Shanxi
80	113	Gl	R80	FH	Taiyuan, Shanxi
81	114	Yx02	R81	FH	Taiyuan, Shanxi
82	115	Smjhg	R82	JH	Chifeng, Inner Mongolia
83	116	Smjzg	R83	JH	Dingxi, Gansu
84	117	Smthg	R84	TH	Dingxi, Gansu
85	118	Smcbg	R85	CB	Fuxian, Shaanxi
86	119	Zs4	R86	FH	Zhangwu, Liaoning
87	120	Zs9	R87	FH	Zhangwu, Liaoning
88	121	Smjfg	R88	JF	Yinchuan, Ningxia
89	122	S1-1-1	R89	FH	Yinchuan, Ningxia
90	123	Smcfg	R90	TH	Yinchuan, Ningxia
91	124	Smbxg	R91	BX	Yinchuan, Ningxia
92	125	5-C3-2	R92	BX	Yinchuan, Ningxia
93	126	Smchg	R93	FH	Yinchuan, Ningxia
94	127	5-C1-1	R94	FH	Yinchuan, Ningxia
95	128	Jhz	R95	FH	Jingbian, Shaanxi
96	129	5-B1-1	R96	FH	Yinchuan, Ningxia
97	130	5-C2-2	R97	FH	Yinchuan, Ningxia
98	131	Hrhb	R98	FH	Yinchuan, Ningxia
99	132	5-B2-1	R99	FH	Fuxian, Shaanxi
100	133	FH133	R100	FH	Yinchuan, Ningxia
101	134	Smhfg	R101	TH	Yinchuan, Ningxia
102	135	Jhym	R102	JH	Jingbian, Shaanxi
103	136	Jhwm	R103	JH	Jingbian, Shaanxi
104	137	N-1	R104	FH	Lingbao, Henan
105	138	Ymhh	R105	JH	Yinchuan, Ningxia
106	139	Jgz1	R106	BX	Chifeng, Inner Mongolia
107	140	Jgz5	R107	FH	Chifeng, Inner Mongolia
108	141	Jgz4	R108	FH	Chifeng, Inner Mongolia
109	142	Jgz8	R109	FH	Chifeng, Inner Mongolia
110	143	Jd3	R110	FH	Chifeng, Inner Mongolia
111	144	Jw1	R111	BX	Chifeng, Inner Mongolia
112	078	JB078	R112	BX	Yinchuan, Ningxia
113	079	JB079	R113	FH	Yangling, Shaanxi
114	077	JB077	R114	FH	Yangling, Shaanxi
115	073	FH073	R115	FH	Chifeng, Inner Mongolia
116	036	FC036	R116	BX	Jingbian, Shaanxi
117	037	BX037	R117	BX	Wuzhong, Ningxia
118	023	JH023	R118	JH	Wuzhong, Ningxia
119	041	TH041	R120	TH	Wuzhong, Ningxia
Note:BX,FH,JH,TH,JF,CB are white-flowered germplasms,compound-flowered germplasms, red-flowered germplasms, pink-flowered germplasms, yellow- and pink-flowered germplasms, and double flowered germplasms, respectively.

## Sheet: Table S2 
Table S2 Sequence information on the genomes of 119 elite germplasms of X. sorbifolium
Resequencing No.	Clean_Reads	Clean_Base	Q30(%)	GC(%)	Mapped(%)	Properly_mapped(%)	Ave_depth
R01	7024029	2103733836	94.51	35.51	98.08	90.8	4
R02	7352069	2202026398	93.87	36.01	95.48	88.09	3
R03	6977804	2089853934	94.19	36.03	96.61	88.78	3
R04	7572156	2266359650	93.4	36.51	98.45	89.5	4
R05	8134129	2436481196	94.19	35.5	98.28	91.08	4
R06	6816399	2041581444	90.49	36.19	97.44	88.46	3
R07	8782888	2630300634	93.81	35.83	97.63	90.64	4
R08	6849428	2051275592	94.27	35.69	96.16	87.94	3
R09	7430898	2225226334	94.22	36.07	96.28	88.7	4
R10	9500248	2845140154	93.77	35.9	98.24	90.82	5
R100	7607634	2278556356	93.44	36.29	97.91	91.16	4
R101	7701031	2305895980	93.59	36.09	98.6	92.46	4
R102	7578472	2267769210	92.99	36.05	98.38	91.97	4
R103	7577802	2269291158	93.3	36.06	98.86	92.77	4
R104	7984359	2391217728	93.12	36.19	98.49	91.86	4
R105	7748512	2320682722	92.86	36.03	98.57	92.23	4
R106	9153450	2739513964	93.08	36.06	98.46	91.85	5
R107	8191768	2452853954	92.66	35.97	98.05	91.01	4
R108	7114302	2130916434	93.1	35.88	98.72	92.7	4
R109	8371166	2506967536	92.88	36.03	98.27	91.7	4
R11	9631039	2884059636	94.27	36.22	97.46	88.46	4
R110	8183606	2450350768	92.71	36.09	98.21	91.26	4
R111	8748861	2618931922	92.93	36.14	96.84	89.12	4
R112	8618093	2580828208	93.41	35.97	97.72	90.76	4
R113	7943122	2378710396	93	36.13	98.34	90.33	4
R114	7680783	2300083526	93.11	35.92	97.85	90.21	4
R115	8178063	2449296560	93.15	36.06	98.28	90.85	4
R116	7177382	2149488332	92.42	35.93	94.31	86.99	3
R117	7115513	2131105064	93.59	36.44	97.02	89.35	3
R118	8200225	2456007802	93.25	35.84	96.14	88.92	4
R12	7392132	2213738122	92.51	36.88	96.71	86.55	3
R120	8679730	2598831542	92.72	36.19	96.42	88.48	4
R13	8768309	2626366310	93.95	35.47	96.37	89.02	4
R14	8830590	2644798948	94.01	35.39	93.72	87.09	4
R15	7506025	2247932524	93.14	36.56	97.37	89.03	4
R16	7387370	2212758678	91.67	35.87	96.45	88.15	4
R17	8044706	2409215408	94.02	35.94	97.46	90.3	4
R18	9275341	2778193596	93.48	35.92	98.05	90.1	5
R19	8449248	2531082048	93.89	35.82	97.91	89.88	4
R20	7845553	2350590838	93.08	35.7	97.87	89.38	4
R21	7258007	2172593560	93.79	35.77	98.65	92.1	4
R22	7620898	2282043966	93.66	35.83	98.55	90.48	4
R23	6740688	2018474558	94.02	35.75	98.37	91.63	3
R24	6947293	2080664842	93.6	35.66	98.35	91.59	4
R25	7347269	2199431546	93.03	35.72	98.77	92.35	4
R26	6937160	2077708876	94.16	35.58	98.33	90.87	4
R27	7774492	2328477050	94.03	35.96	98.43	91.55	4
R28	7042000	2108107980	93.19	36.15	98.09	89.25	3
R29	6718520	2011181030	94.63	35.62	98.33	91.4	3
R30	7355396	2201770420	93.88	35.56	98.13	91.91	4
R31	8040191	2407825256	94.02	35.36	97.99	91.12	4
R32	7686575	2301912006	94.2	35.34	98.69	92.32	4
R33	7864738	2355460162	94.09	35.52	98.01	90.78	4
R34	7848079	2350188552	93.65	35.51	97.8	90.38	4
R35	7361296	2204185072	93.72	35.56	98.58	90.91	4
R36	7485939	2242071366	93.67	35.92	98.12	89.95	4
R37	8329626	2493778344	93.37	36.22	98.25	91.07	4
R38	9225850	2762128978	93.98	35.51	97.95	90.78	4
R39	7141799	2139316106	93.56	35.83	98.17	91.13	4
R40	7124576	2134583148	93.74	35.28	98.21	92.53	4
R41	10186098	3049683164	93.14	35.89	97.57	89.37	5
R42	10446008	3128135000	94.16	35.47	96.58	89.19	5
R43	7260076	2174484406	93.88	35.61	98.31	90.55	4
R44	7402252	2216203980	91.63	35.79	96.57	88.92	4
R45	7242174	2168904158	93.92	35.67	98.52	91.96	4
R46	7696498	2305266298	94.09	35.64	98.55	90.94	4
R47	6854988	2052767634	93.43	35.73	98.33	90.83	4
R48	7896245	2364585032	93.52	36.48	97.75	90.05	4
R49	7082968	2120924900	93.77	35.87	97.57	90.52	4
R50	7573797	2268285770	93.04	35.82	98.2	92.28	4
R51	6855731	2053046482	94.1	35.7	98.14	91.02	3
R52	7100224	2126363242	93.4	35.78	96.2	88.99	4
R53	7065108	2113733576	94.69	35.55	98.33	92.36	4
R54	7054409	2112660102	93.65	35.68	98.1	91.17	4
R55	7403906	2217189536	94.05	35.77	98.19	91.38	4
R56	7318472	2191664788	93.71	35.65	98.35	91.08	4
R57	7005620	2097801588	93.05	35.59	98.67	92.1	4
R58	6995151	2094781182	94.39	35.69	98.43	91.57	4
R59	7543759	2258489534	92.6	35.6	98.65	91.29	4
R60	6783177	2031304598	94.35	35.87	98.4	91.49	3
R61	6727043	2014578732	94.07	35.7	98.36	91.24	3
R62	7412028	2219856734	94.07	35.29	97.13	91.1	4
R63	7325697	2194239216	93.36	35.49	97.75	90.91	4
R64	7289641	2182869746	93.68	35.64	96.14	89.72	4
R65	7472781	2238098588	93.12	35.76	96.2	89.18	4
R66	7069639	2117297450	93.36	35.56	97.71	91.11	4
R67	6759315	2024481826	93.38	36.31	98.12	90.94	3
R68	8132043	2435419940	93.87	36.04	96.64	89.92	4
R69	7632283	2285504620	93.13	36.22	98.58	91.69	4
R70	8426509	2523354230	93.38	36	97.82	90.68	4
R71	7889368	2362406618	92.81	36.27	98.39	90.81	4
R72	7192006	2153883664	92.93	35.89	98.32	91.13	4
R73	8452204	2530973072	93.46	36.1	98.81	92.63	4
R74	7709763	2308792472	92.85	36.07	98.86	92.53	4
R75	7532056	2255985200	93.55	35.81	98.14	91.7	4
R76	7946383	2379834316	93.38	36.17	98.45	92.27	4
R77	7087910	2122080716	93.4	35.74	98.58	92.92	4
R78	7459933	2234425570	90.45	36.33	98.69	92.06	4
R79	7269939	2177162948	92.92	36.2	98.68	91.86	4
R80	7216773	2161065604	93.62	36.02	98.85	92.52	4
R81	8915435	2670255274	93.44	36	98.44	90.99	4
R82	8415757	2520352240	93.14	35.92	98.62	92.29	4
R83	7785237	2331767166	91.84	36.44	98.62	90.06	4
R84	7848631	2350656076	92.79	36.28	98.53	90.31	4
R85	6986125	2092250094	93.31	36.08	98.71	92.34	4
R86	7421205	2222328738	93.33	35.78	98.84	94.08	4
R87	9035895	2706282748	92.34	36.01	98.35	91.46	4
R88	7615981	2280921210	91.15	35.86	98.48	91.3	4
R89	7487264	2242506878	92.83	35.78	98.48	90.91	4
R90	7841575	2348546998	93.41	35.75	98.37	91.06	4
R91	7834365	2346419276	93.13	36.09	98.22	91.01	4
R92	7097160	2125754584	93.73	36.01	98.53	93.15	4
R93	7910071	2367790914	92.79	36.16	98.55	91.89	4
R94	7486140	2241909908	93.05	36.02	98.81	92.73	4
R95	7640169	2288215144	93.07	35.88	98.63	92.16	4
R96	7027944	2104558542	93.06	35.94	98.83	92.97	4
R97	7540300	2258276420	93.31	36.03	98.57	91.88	4
R98	7471498	2237021012	93.18	36.01	98.59	91.95	4
R99	7372585	2208227102	93.29	36.31	98.63	92.31	4
Q30 (%) indicates the percentage of bases whose mass value is greater than or equal to 30; Mapped (%) indicates the percentage of the clean sequenced data mapped to the reference genomes.

## Sheet: Table S3
Table S3 Statistics of SNPs identified in this study
Resequencing No.	SNP number	Transition	Transversion	Ti/Tv	Heterozygosity	Homozygosity	Het-ratio
R01	902755	629982	272773	2.3	307638	595117	0.3407
R02	818996	572347	246649	2.32	311456	507540	0.3802
R03	810124	568370	241754	2.35	274470	535654	0.3387
R04	883796	621741	262055	2.37	320028	563768	0.3621
R05	965091	674336	290755	2.31	373475	591616	0.3869
R06	799916	559460	240456	2.32	237693	562223	0.2971
R07	958437	668643	289794	2.3	387138	571299	0.4039
R08	748469	522640	225829	2.31	127112	621357	0.1698
R09	835366	584938	250428	2.33	276074	559292	0.3304
R10	1065110	746181	318929	2.33	483982	581128	0.4543
R100	914841	642209	272632	2.35	356590	558251	0.3897
R101	941448	661064	280384	2.35	376715	564733	0.4001
R102	899362	629740	269622	2.33	326724	572638	0.3632
R103	837256	586118	251138	2.33	237346	599910	0.2834
R104	848886	594096	254790	2.33	328418	520468	0.3868
R105	936128	657710	278418	2.36	348027	588101	0.3717
R106	1050267	735619	314648	2.33	445241	605026	0.4239
R107	869551	606845	262706	2.3	358305	511246	0.412
R108	806285	563163	243122	2.31	314003	492282	0.3894
R109	891510	624654	266856	2.34	384431	507079	0.4312
R11	997113	696520	300593	2.31	379842	617271	0.3809
R110	971320	679866	291454	2.33	393210	578110	0.4048
R111	1002191	702505	299686	2.34	418414	583777	0.4174
R112	948983	664204	284779	2.33	444944	504039	0.4688
R113	931588	652061	279527	2.33	337542	594046	0.3623
R114	895049	626883	268166	2.33	365137	529912	0.4079
R115	907707	635083	272624	2.32	397415	510292	0.4378
R116	829292	582378	246914	2.35	315668	513624	0.3806
R117	811358	568014	243344	2.33	275378	535980	0.3394
R118	918555	642911	275644	2.33	375714	542841	0.409
R12	782660	547700	234960	2.33	312657	470003	0.3994
R120	919629	642478	277151	2.31	386335	533294	0.42
R13	1019712	712175	307537	2.31	402717	616995	0.3949
R14	949609	665312	284297	2.34	404822	544787	0.4263
R15	851700	597743	253957	2.35	317977	533723	0.3733
R16	832201	581521	250680	2.31	321059	511142	0.3857
R17	965556	676435	289121	2.33	326485	639071	0.3381
R18	1001660	703006	298654	2.35	410752	590908	0.41
R19	967548	676189	291359	2.32	422314	545234	0.4364
R20	918719	642209	276510	2.32	387355	531364	0.4216
R21	925442	645957	279485	2.31	354268	571174	0.3828
R22	951902	667244	284658	2.34	394909	556993	0.4148
R23	763254	531921	231333	2.29	294826	468428	0.3862
R24	788105	549072	239033	2.29	291411	496694	0.3697
R25	860692	601658	259034	2.32	302207	558485	0.3511
R26	847093	592612	254481	2.32	333365	513728	0.3935
R27	888880	622107	266773	2.33	327760	561120	0.3687
R28	854036	598781	255255	2.34	299850	554186	0.351
R29	799872	558255	241617	2.31	270904	528968	0.3386
R30	875030	611299	263731	2.31	309694	565336	0.3539
R31	909169	634967	274202	2.31	369012	540157	0.4058
R32	945886	660351	285535	2.31	353517	592369	0.3737
R33	996855	696750	300105	2.32	366058	630797	0.3672
R34	954641	668373	286268	2.33	360080	594561	0.3771
R35	919522	643648	275874	2.33	365409	554113	0.3973
R36	916836	641918	274918	2.33	359150	557686	0.3917
R37	965170	677209	287961	2.35	388074	577096	0.402
R38	1099155	767781	331374	2.31	501002	598153	0.4558
R39	837312	587089	250223	2.34	321007	516305	0.3833
R40	884102	617643	266459	2.31	327062	557040	0.3699
R41	1117609	784869	332740	2.35	515059	602550	0.4608
R42	1098741	767707	331034	2.31	517906	580835	0.4713
R43	831436	581821	249615	2.33	327252	504184	0.3935
R44	846199	591965	254234	2.32	333080	513119	0.3936
R45	857457	598456	259001	2.31	320872	536585	0.3742
R46	902061	630039	272022	2.31	288870	613191	0.3202
R47	831661	581647	250014	2.32	283124	548537	0.3404
R48	894795	626582	268213	2.33	335307	559488	0.3747
R49	813117	568081	245036	2.31	306494	506623	0.3769
R50	925419	648275	277144	2.33	411172	514247	0.4443
R51	873275	609948	263327	2.31	319764	553511	0.3661
R52	903367	632958	270409	2.34	319064	584303	0.3531
R53	836637	585091	251546	2.32	313537	523100	0.3747
R54	881595	615119	266476	2.3	311968	569627	0.3538
R55	842087	588279	253808	2.31	332182	509905	0.3944
R56	863605	602741	260864	2.31	366920	496685	0.4248
R57	842374	588086	254288	2.31	352206	490168	0.4181
R58	843587	589191	254396	2.31	335221	508366	0.3973
R59	929507	649371	280136	2.31	343754	585753	0.3698
R60	752835	525568	227267	2.31	285434	467401	0.3791
R61	844132	588714	255418	2.3	285695	558437	0.3384
R62	937695	654604	283091	2.31	360382	577313	0.3843
R63	861565	601620	259945	2.31	297716	563849	0.3455
R64	825494	576276	249218	2.31	313933	511561	0.3802
R65	832267	580860	251407	2.31	241943	590324	0.2907
R66	801912	560315	241597	2.31	307255	494657	0.3831
R67	766213	538210	228003	2.36	269242	496971	0.3513
R68	882723	619379	263344	2.35	340376	542347	0.3855
R69	887069	622008	265061	2.34	336857	550212	0.3797
R70	941611	660736	280875	2.35	388875	552736	0.4129
R71	905890	635694	270196	2.35	326659	579231	0.3605
R72	808119	564783	243336	2.32	306332	501787	0.379
R73	1015910	713670	302240	2.36	428729	587181	0.422
R74	917972	644465	273507	2.35	400875	517097	0.4366
R75	874742	611890	262852	2.32	347715	527027	0.3975
R76	935981	659524	276457	2.38	389487	546494	0.4161
R77	855534	599476	256058	2.34	305060	550474	0.3565
R78	852861	599590	253271	2.36	332326	520535	0.3896
R79	849826	594786	255040	2.33	305311	544515	0.3592
R80	893720	625956	267764	2.33	335595	558125	0.3755
R81	1040365	728923	311442	2.34	436249	604116	0.4193
R82	989440	693907	295533	2.34	437284	552156	0.4419
R83	853956	598903	255053	2.34	319612	534344	0.3742
R84	947360	664093	283267	2.34	356261	591099	0.376
R85	831167	583362	247805	2.35	336301	494866	0.4046
R86	375487	262794	112693	2.33	272168	103319	0.7248
R87	696434	487183	209251	2.32	326147	370287	0.4683
R88	914574	640938	273636	2.34	298329	616245	0.3261
R89	872052	609917	262135	2.32	342381	529671	0.3926
R90	844291	588338	255953	2.29	333608	510683	0.3951
R91	930714	651883	278831	2.33	342538	588176	0.368
R92	866014	608919	257095	2.36	371735	494279	0.4292
R93	956810	671521	285289	2.35	380990	575820	0.3981
R94	881353	617453	263900	2.33	343474	537879	0.3897
R95	868720	607195	261525	2.32	354706	514014	0.4083
R96	847474	593592	253882	2.33	318021	529453	0.3752
R97	899592	631281	268311	2.35	345489	554103	0.384
R98	831242	582348	248894	2.33	292805	538437	0.3522
R99	871214	610734	260480	2.34	260874	610340	0.2994

## Sheet: Table S4
Table S4 The genetic groups among 119 elite germplasms of X. sorbifolium by population structure analysis
Resequencing No.	Q1	Q2	Q3	Group
R01	1e-05	0.99998	1e-05	Q2
R02	0.041979	0.516653	0.441368	Q2
R03	0.237592	0.040556	0.721853	Q3
R04	0.999978	1.2e-05	1e-05	Q1
R05	0.99998	1e-05	1e-05	Q1
R06	0.99998	1e-05	1e-05	Q1
R07	0.775338	1e-05	0.224652	Q1
R08	1e-05	0.99998	1e-05	Q2
R09	0.149864	1e-05	0.850126	Q3
R10	0.825346	1e-05	0.174644	Q1
R100	0.999979	1.1e-05	1e-05	Q1
R101	0.041786	0.419677	0.538538	Q3
R102	1e-05	0.99998	1e-05	Q2
R103	0.141132	1e-05	0.858858	Q3
R104	0.071455	0.666349	0.262196	Q2
R105	0.99998	1e-05	1e-05	Q1
R106	0.153288	0.821235	0.025476	Q2
R107	1.7e-05	0.999973	1e-05	Q2
R108	1e-05	0.99998	1e-05	Q2
R109	1e-05	0.672663	0.327327	Q2
R11	0.626003	1e-05	0.373987	Q1
R110	0.061315	0.819713	0.118971	Q2
R111	1e-05	0.719762	0.280228	Q2
R112	0.055713	0.413292	0.530995	Q3
R113	0.040524	0.959466	1e-05	Q2
R114	0.054119	0.931865	0.014015	Q2
R115	0.07228	0.281538	0.646182	Q3
R116	0.086785	0.738637	0.174578	Q2
R117	0.117792	0.832182	0.050026	Q2
R118	0.613164	1e-05	0.386826	Q1
R12	0.275671	0.064543	0.659787	Q3
R120	0.053149	0.395038	0.551813	Q3
R13	0.688261	1e-05	0.311729	Q1
R14	0.460085	1e-05	0.539905	Q3
R15	0.055389	0.041407	0.903204	Q3
R16	0.527033	1e-05	0.472957	Q1
R17	0.99998	1e-05	1e-05	Q1
R18	0.50548	1e-05	0.49451	Q1
R19	0.199448	1e-05	0.800542	Q3
R20	0.224543	0.355967	0.41949	Q3
R21	0.100895	0.899095	1e-05	Q2
R22	0.02956	0.275912	0.694527	Q3
R23	0.25436	0.214371	0.531269	Q3
R24	0.151882	0.116806	0.731313	Q3
R25	0.149139	0.171818	0.679044	Q3
R26	0.529619	0.038892	0.431489	Q1
R27	1e-05	1e-05	0.99998	Q3
R28	0.122027	1e-05	0.877963	Q3
R29	0.040684	0.117241	0.842074	Q3
R30	0.033296	0.154753	0.811951	Q3
R31	0.096344	0.151004	0.752652	Q3
R32	0.066106	1e-05	0.933884	Q3
R33	1e-05	0.99998	1e-05	Q2
R34	1e-05	0.093005	0.906985	Q3
R35	0.224757	0.036551	0.738693	Q3
R36	0.044834	0.218458	0.736708	Q3
R37	1e-05	1e-05	0.99998	Q3
R38	0.113109	0.403213	0.483677	Q3
R39	1e-05	0.25395	0.74604	Q3
R40	0.562274	0.093815	0.343911	Q1
R41	1e-05	1e-05	0.99998	Q3
R42	0.111041	1e-05	0.888949	Q3
R43	0.048969	0.605562	0.34547	Q2
R44	0.04016	0.807383	0.152457	Q2
R45	1.5e-05	1e-05	0.999975	Q3
R46	0.042705	0.770439	0.186856	Q2
R47	0.185965	1e-05	0.814025	Q3
R48	0.176645	0.782137	0.041217	Q2
R49	0.161704	1e-05	0.838286	Q3
R50	0.039559	1e-05	0.960431	Q3
R51	0.179837	0.820153	1e-05	Q2
R52	0.089885	0.786095	0.12402	Q2
R53	0.082217	0.859907	0.057876	Q2
R54	1e-05	1e-05	0.99998	Q3
R55	1e-05	0.177845	0.822145	Q3
R56	0.054842	0.25639	0.688768	Q3
R57	0.03063	1e-05	0.96936	Q3
R58	1e-05	0.11603	0.88396	Q3
R59	1e-05	1e-05	0.99998	Q3
R60	1e-05	0.864241	0.135749	Q2
R61	1e-05	0.99998	1e-05	Q2
R62	0.232813	0.302762	0.464425	Q3
R63	1e-05	0.99998	1e-05	Q2
R64	1e-05	0.016398	0.983592	Q3
R65	1e-05	1e-05	0.99998	Q3
R66	1e-05	0.105364	0.894626	Q3
R67	1e-05	1e-05	0.99998	Q3
R68	1e-05	1e-05	0.99998	Q3
R69	1e-05	0.99998	1e-05	Q2
R70	0.071674	0.73712	0.191206	Q2
R71	1e-05	0.99998	1e-05	Q2
R72	0.451714	0.032194	0.516091	Q3
R73	0.99998	1e-05	1e-05	Q1
R74	0.99998	1e-05	1e-05	Q1
R75	0.316077	0.097518	0.586405	Q3
R76	1e-05	1e-05	0.99998	Q3
R77	0.442632	1e-05	0.557358	Q3
R78	0.862691	1e-05	0.137299	Q1
R79	0.072122	0.886767	0.04111	Q2
R80	0.003609	0.348527	0.647864	Q3
R81	0.063944	0.90565	0.030406	Q2
R82	0.077151	0.094418	0.828431	Q3
R83	1e-05	1e-05	0.99998	Q3
R84	0.052357	0.947633	1e-05	Q2
R85	1e-05	0.067338	0.932652	Q3
R86	0.047948	0.649685	0.302368	Q2
R87	0.096588	0.713469	0.189942	Q2
R88	0.027913	1e-05	0.972077	Q3
R89	0.020557	0.278083	0.70136	Q3
R90	1e-05	0.080204	0.919786	Q3
R91	1e-05	0.99998	1e-05	Q2
R92	0.008038	0.577104	0.414859	Q2
R93	0.172978	0.775621	0.051402	Q2
R94	0.062894	0.118226	0.81888	Q3
R95	0.182635	0.217885	0.59948	Q3
R96	0.063609	0.112565	0.823826	Q3
R97	0.99998	1e-05	1e-05	Q1
R98	1e-05	1e-05	0.99998	Q3
R99	1e-05	1e-05	0.99998	Q3
Note: Q1: The possibility that the sample came from the first primitive ancestor; Q2: The possibility that the sample came from the second primitive ancestor; Q3: The possibility that the sample came from the third primitive ancestor.

## Sheet: Table S5
Table S5 The genetic groups among 119 elite germplasms of X. sorbifolium by principal component analysis
Resequencing No.	PC1	PC2	PC3	PC4	PC5	PC6	PC7	PC8	PC9	PC10
R01	0.1664	0.0838	-0.2382	-0.0311	0.2861	0.4371	-0.2038	-0.1209	-0.0264	-0.0604
R02	0.0367	-0.0192	-0.0691	-0.0167	-0.0195	-0.0441	0.0608	0.1193	0.0125	0.0678
R03	-0.0742	-0.0242	0.0202	-0.0468	0.1131	0.0196	0.0713	0.0749	0.1005	0.0662
R04	-0.1092	0.2284	0.0302	0.0227	-0.0403	0.0217	-0.0153	-0.0455	-0.0121	0.0204
R05	-0.1302	0.2076	0.0464	0.0113	-0.0205	0.0244	-0.0067	-0.0884	-0.0665	-0.0426
R06	-0.1059	0.1234	0.0351	0.0331	-0.0035	0.0189	-0.0042	-0.0299	0.0138	0.0067
R07	-0.1008	0.0853	-0.0274	0.3298	-0.0364	-0.0414	-0.0933	0.0434	0.0041	-0.0439
R08	0.1291	-0.0027	-0.1097	-0.0203	-0.0344	-0.0472	0.0279	0.0783	0.0293	0.1014
R09	-0.0798	-0.0612	0.0454	-0.085	0.1056	0.0871	0.149	0.0238	0.1273	0.0213
R10	-0.1183	0.1572	0.0564	-0.0157	0.129	-0.0339	-0.0049	0.04	0.0828	-0.1205
R100	-0.1131	0.2631	0.0538	-0.2033	0.004	0.0031	0.053	-0.0178	0.0255	-0.0004
R101	0.0197	-0.032	-0.0526	-0.0516	0.0413	-0.1406	0.0091	-0.0276	-0.0128	-0.2099
R102	0.13	0.0455	-0.1241	0.0285	0.0538	0.0824	-0.0397	-0.0125	0.0267	0.027
R103	-0.0618	-0.0522	0.0111	0.034	-0.0279	0.0241	0.0234	0.0394	-0.0812	0.167
R104	0.0775	0.0002	-0.0536	-0.0186	-0.1132	-0.1263	0.0184	0.1009	0.0587	0.0382
R105	-0.1057	0.2529	0.0217	0.0657	0.0229	-0.0207	-0.0539	-0.0071	-0.0579	-0.0053
R106	0.1083	0.0618	-0.044	-0.0486	-0.0142	-0.0714	0.0874	0.0136	0.1125	0.018
R107	0.1375	0.0206	-0.1315	0.0319	-0.0051	-0.2079	0.0699	-0.2525	0.0162	0.2634
R108	0.1321	0.0206	-0.1257	0.0306	-0.0038	-0.2032	0.0689	-0.2499	0.0123	0.2609
R109	0.0795	-0.0259	-0.0844	0.0082	-0.0459	-0.1192	0.0597	-0.1048	-0.0728	-0.0965
R11	-0.0882	0.0668	0.0052	0.3248	-0.1017	-0.0023	-0.0939	-0.0821	-0.0589	-0.0791
R110	0.1081	0.0209	0.0168	-0.0526	0.0193	-0.037	0.1096	0.0084	0.0038	-0.1308
R111	0.0908	-0.0265	-0.0894	-0.0168	-0.0629	-0.0512	0.1104	0.0114	-0.0133	-0.0044
R112	0.0355	-0.044	0.0084	0.0839	0.0038	0.0004	-0.0887	0.0775	-0.038	0.0368
R113	0.1224	0.0431	-0.132	-0.0015	0.0693	0.1267	-0.0337	0.0227	-0.0038	0.0238
R114	0.1211	0.0277	0.0183	-0.0195	0.0192	-0.0372	0.0636	0.0482	0.0429	-0.0141
R115	-0.0051	-0.0485	-0.0135	0.0073	0.1294	-0.1098	0.0853	-0.1182	-0.0236	-0.0473
R116	0.0769	0.0172	-0.0756	0.0132	-0.0453	-0.0534	0.0886	-0.032	-0.0087	0.0081
R117	0.1059	0.0385	0.0467	0.0019	-0.0274	-0.0086	0.0084	-0.0361	0.0042	-0.0182
R118	-0.0888	0.0916	0.0203	-0.126	-0.0063	-0.0308	-0.0149	0.0295	0.0012	0.0084
R12	-0.0406	-0.0069	0.0256	0.1377	0.0221	0.0029	0.0557	0.0831	0.0139	0.0364
R120	0.0189	-0.0327	-0.0109	-0.0526	0.004	-0.0428	0.032	0.0502	0.0255	-0.0947
R13	-0.0977	0.1364	0.0289	-0.1714	-0.0041	-0.0207	-0.0411	-0.005	0.0094	-0.0108
R14	-0.0957	0.0435	0.0458	-0.0528	0.0124	-0.0048	0.0227	-0.0056	-0.0696	0.1361
R15	-0.0471	-0.0712	0.0088	-0.1015	0.0366	-0.0223	-0.1436	0.0681	-0.0037	0.0383
R16	-0.0804	0.0499	0.023	0.0821	0.0199	0.0123	-0.0305	0.0769	-0.0443	0.1687
R17	-0.1103	0.2673	0.0401	0.0162	-0.003	0.0088	-0.043	-0.0443	-0.0465	0.0746
R18	-0.1061	0.0359	0.0262	0.1632	0.0243	0.0128	-0.0357	0.0265	-0.0365	0.1185
R19	-0.0776	-0.0535	-0.0067	0.1062	-0.1332	0.1017	0.0399	0.0148	0.0611	0.0278
R20	-0.0021	0.0088	-0.0471	0.1138	0.0864	-0.0978	-0.0333	0.1088	0.1069	-0.1297
R21	0.122	0.0572	0.0209	-0.0056	-0.0034	-0.0182	0.0286	-0.0279	0.0295	0.0255
R22	0.0039	-0.0555	-0.0271	-0.0706	-0.0379	0.0264	-0.0326	0.0479	-0.4379	-0.1964
R23	-0.023	0.011	-0.0101	-0.0219	-0.0832	-0.0082	-0.0421	-0.0519	-0.0034	0.0196
R24	-0.0317	-0.0381	0.0347	0.0977	-0.0087	0.0039	-0.0274	0.0304	-0.0437	0.0889
R25	-0.0231	-0.0387	0.0316	-0.0156	-0.0488	0.0262	-0.1022	0.0197	-0.141	0.1063
R26	-0.0761	0.0628	0.0118	-0.0478	0.024	-0.007	0.0274	-0.0176	-0.0027	0.0715
R27	-0.0806	-0.124	0.0269	-0.064	0.0252	0.0453	-0.0431	-0.1416	0.054	-0.0398
R28	-0.0835	-0.0528	0.0146	-0.0369	-0.0733	0.0387	-0.0582	0.0575	-0.0178	-0.0008
R29	-0.0337	-0.0711	-0.0183	-0.067	-0.1019	-0.0194	-0.0577	0.0733	-0.0344	-0.0014
R30	-0.0253	-0.0685	-0.0237	-0.0129	-0.0711	-0.0409	-0.1249	0.0467	-0.0883	-0.0565
R31	-0.0331	-0.0526	-0.0032	-0.0268	-0.0191	-0.0176	-0.0884	0.039	0.0503	0.0793
R32	-0.0716	-0.0718	-0.0057	-0.0239	-0.1478	0.0902	0.0022	0.0974	-0.0001	0.0268
R33	0.1426	0.0715	-0.2001	-0.0258	0.2358	0.3573	-0.1639	-0.0955	-0.0176	-0.0509
R34	-0.0363	-0.1221	0.004	-0.0097	-0.053	0.0986	0.0697	0.0354	-0.0729	-0.1026
R35	-0.0648	-0.028	0.0101	0.1251	0.0355	0.0354	0.0555	0.1588	0.046	-0.05
R36	-0.0239	-0.0527	-0.0269	0.0215	0.1254	0.0053	0.1529	0.0752	0.0512	-0.1095
R37	-0.0772	-0.0825	0.0262	0.0301	0.2182	-0.0186	0.2624	-0.1033	-0.0066	-0.0683
R38	0.0084	-0.0073	-0.0654	0.0608	0.1369	0.1155	0.2066	0.0599	0.0235	-0.0633
R39	-0.0126	-0.0701	-0.0137	-0.0007	0.1276	-0.0936	0.1171	-0.0742	0.0102	-0.0304
R40	-0.0753	0.0823	0.0136	-0.0309	-0.0023	-0.0746	0.0351	-0.0982	0.0264	-0.1337
R41	-0.079	-0.1283	0.0402	-0.0206	0.1799	-0.0938	-0.0709	-0.0835	-0.0209	0.1202
R42	-0.0907	-0.0783	0.0153	0.0625	0.27	-0.1361	0.0825	0.0084	0.0364	-0.0746
R43	0.0608	-0.0092	-0.0251	-0.0051	-0.0179	-0.0929	-0.0039	-0.0396	-0.0497	-0.11
R44	0.0972	0.0144	-0.0464	-0.0218	-0.051	-0.0307	0.0857	-0.0053	0.0072	0.0214
R45	-0.0607	-0.1365	0.0037	-0.098	0.1006	-0.0684	-0.1951	0.1354	0.0735	0.0706
R46	0.1094	0.0198	-0.0027	-0.0233	-0.1259	-0.0152	0.0411	-0.0435	0.0521	-0.0535
R47	-0.0961	-0.0362	0.0473	0.0206	0.032	0.0773	0.1118	0.0079	0.1031	0.0216
R48	0.0823	0.0581	-0.1197	-0.0938	-0.1472	-0.117	-0.0251	0.262	0.1323	-0.1696
R49	-0.0521	-0.0339	0.0134	-0.0642	-0.1268	0.0203	-0.0234	-0.0076	0.0003	0.065
R50	-0.0447	-0.0828	0.0071	-0.0654	-0.1398	0.1503	0.0571	0.0107	-0.0799	0.1247
R51	0.1003	0.0816	-0.1278	0.1276	0.0062	0.0007	-0.0672	0.068	0.0589	0.0105
R52	0.0967	0.0183	-0.0436	-0.0569	-0.0464	0.0298	0.0283	0.1166	-0.0985	-0.0683
R53	0.1067	0.0312	-0.0332	0.0011	-0.0799	-0.0241	0.0466	-0.0003	0.0293	0.0448
R54	-0.0676	-0.146	0.0121	0.0186	-0.2131	0.2164	0.0967	-0.0966	0.2092	-0.0429
R55	-0.0106	-0.0813	-0.0117	-0.0046	-0.0529	-0.038	-0.0289	-0.085	-0.0483	-0.0893
R56	-0.0051	-0.0478	0.005	-0.0237	-0.0304	0.0032	-0.1051	-0.0177	-0.0881	0.0185
R57	-0.0424	-0.0793	0.0053	-0.0625	-0.1329	0.1416	0.0518	0.0099	-0.0787	0.121
R58	-0.0115	-0.0726	0.0251	-0.0468	0.0266	-0.0024	0.0106	0.042	-0.1523	0.081
R59	-0.0697	-0.1498	0.0123	0.0201	-0.2179	0.2206	0.099	-0.0974	0.2136	-0.043
R60	0.1151	-0.006	-0.0702	0.017	-0.0482	-0.0672	0.0056	-0.0901	0.0091	0.0923
R61	0.2343	0.0206	0.3683	0.0385	0.0208	0.0349	-0.0388	0.001	0.0148	-0.0184
R62	-0.0096	0.0124	-0.018	-0.0068	-0.0317	0.0895	-0.0471	0.1269	-0.0069	0.0856
R63	0.2368	0.0216	0.3705	0.0385	0.0215	0.0376	-0.0394	0.0009	0.0167	-0.0163
R64	-0.0318	-0.0743	0.0405	-0.061	-0.0721	0.0944	0.0309	0.0161	-0.05	0.0812
R65	-0.0659	-0.1184	0.019	-0.0775	-0.1041	-0.0135	-0.213	-0.3109	0.1864	-0.1673
R66	-0.0116	-0.0726	0.0243	-0.047	0.0275	-0.0044	0.0089	0.0403	-0.1486	0.0793
R67	-0.0558	-0.1327	0.0308	-0.0875	0.1667	-0.108	-0.208	0.1285	0.073	0.0881
R68	-0.0617	-0.1441	0.0341	-0.0914	0.1805	-0.1161	-0.2219	0.1413	0.0807	0.0936
R69	0.1734	0.0307	0.1787	0.0296	0.0184	0.0005	-0.0023	-0.0067	0.0212	-0.0083
R70	0.0812	0.0194	-0.1041	-0.033	-0.0434	-0.0512	-0.0439	0.0884	0.1035	0.0002
R71	0.2428	0.0213	0.3796	0.04	0.0225	0.0358	-0.0401	0.0021	0.0174	-0.019
R72	-0.0639	0.0225	-0.0218	0.2608	-0.0792	0.0063	0.0069	0.0168	0.0342	-0.0067
R73	-0.1202	0.2777	0.0576	-0.2135	0.005	0.0055	0.0564	-0.0176	0.0276	-0.0024
R74	-0.1013	0.1304	0.001	0.2147	-0.0579	0.0057	-0.0849	-0.0266	-0.0448	0.0138
R75	-0.0538	-0.0073	-0.0068	0.2679	-0.0878	-0.0043	-0.057	-0.0517	0.0023	-0.1084
R76	-0.0687	-0.1361	0.0243	-0.0584	0.1016	-0.046	-0.2026	0.0929	0.1088	0.1307
R77	-0.0871	0.006	-0.0168	0.2612	0.1097	-0.0731	-0.0854	0.1194	0.1047	-0.0892
R78	-0.0825	0.1508	0.0303	-0.1627	-0.0165	-0.011	-0.0066	-0.0484	0.0773	-0.0059
R79	0.1017	0.0377	-0.0948	0.0229	0.0317	0.0493	-0.0208	0.0064	0.0352	0.0434
R80	0.0082	-0.0662	-0.0191	-0.075	-0.0275	0.0265	0.1023	0.0569	-0.0186	-0.1761
R81	0.1211	0.0459	-0.1315	0.0068	0.0514	0.0704	-0.0496	-0.0165	0.054	0.056
R82	-0.0312	-0.0479	0.0646	-0.0328	-0.0297	0.1129	0.1704	0.0785	-0.0653	0.1331
R83	-0.0429	-0.1078	0.0219	-0.0089	0.1905	-0.1051	0.1759	-0.1668	-0.0846	0.0239
R84	0.1189	0.047	-0.1303	0.0094	0.0547	0.1099	0.0174	0.031	0.0078	0.0171
R85	-0.0275	-0.0698	0.0349	-0.0578	-0.0677	0.0939	0.0317	0.015	-0.0467	0.0792
R86	0.0569	-0.0008	-0.0704	0.0174	-0.0408	-0.1047	0.0022	-0.0763	-0.034	0.1056
R87	0.0852	0.0232	-0.0932	0.0102	-0.0614	-0.1105	0.0253	-0.0908	-0.0804	0.0948
R88	-0.0879	-0.0758	0.0191	0.0845	0.1615	0.0873	0.2826	0.0634	0.0506	-0.0989
R89	0.0052	-0.054	-0.0275	-0.0679	-0.0369	0.0277	-0.0293	0.0466	-0.4192	-0.1859
R90	-0.0274	-0.0862	0.0008	0.0243	-0.0988	0.0638	0.1309	0.0079	-0.005	0.0724
R91	0.2476	0.0223	0.3853	0.0411	0.0228	0.0395	-0.0407	0.0029	0.0169	-0.0201
R92	0.0552	-0.0272	-0.0689	-0.002	-0.0508	-0.0921	-0.011	0.0051	0.0516	-0.0529
R93	0.0854	0.0585	-0.1216	-0.0961	-0.1504	-0.1208	-0.0244	0.2685	0.1361	-0.1741
R94	-0.0225	-0.0554	0.0127	-0.0014	0.0176	-0.1072	-0.0511	-0.0782	-0.1984	-0.1235
R95	-0.0202	-0.0203	0.0074	0.0895	-0.0014	0.0219	-0.0122	-0.0167	-0.0403	0.1257
R96	-0.023	-0.0536	0.0121	-0.0022	0.0176	-0.1054	-0.0519	-0.0776	-0.1976	-0.1206
R97	-0.1127	0.2614	0.0534	-0.2021	0.0043	0.0034	0.0535	-0.0167	0.0269	-0.0004
R98	-0.079	-0.1199	0.0265	-0.0603	0.0234	0.0429	-0.0418	-0.1389	0.052	-0.0384
R99	-0.0672	-0.1208	0.021	-0.082	-0.1088	-0.0149	-0.2203	-0.3207	0.1931	-0.1723

## Sheet: Table S6 
Table S6 Distribution of different colored flower germplasms and double flowered germplasms in inferred groups clustered by phylogeneti analysis, population structure analysis, and PCA analysis
Inferred groups		White-flowered	Compound-flowered	Red-flowered	Pink-flowered	Yellow and pink flowered	Double flowered	Total
Phylogeneti analysis group	G1	10	11	15	4	1	1	42
	G2	15	13	0	0	0	1	29
	G3	17	22	1	5	3	0	48
	Total	42	46	16	9	4	2	119
Population structure group	Q1	3	4	8	3	1	0	19
	Q2	16	18	2	2	0	0	38
	Q3	23	24	6	4	3	2	62
	Total	42	46	16	9	4	2	119
PCA analysis group	S1	6	4	6	3	1	0	20
	S2	17	20	1	2	0	0	40
	S3	19	22	9	4	3	2	59
	Total	42	46	16	9	4	2	119

## Sheet: Table S7
Table S7 Distribution of the different original X. sorbifolium germplasms in inferred groups clustered by phylogenetic analysis, population structure analysis and PCA analysis
Inferred groups		Yinchuan, Ningxia	Wuzhong, Ningxia	Minqin, Gansu	Dingxi, Gansu	Chifeng, Inner Mongolia	Jingbian, Shaanxi	Fuxian, Shaanxi	Yangling, Shaanxi	Taiyuan, Shanxi	Huixian, Shandong	Lingbao, Henan	Zhangwu, Liaoning	Total
Phylogeneti analysis group	G1	13	18	6	1	2	2	0	0	0	0	0	0	42
	G2	11	1	3	0	0	0	13	0	1	0	0	0	29
	G3	15	3	0	1	9	2	9	2	2	1	2	2	48
	Total	39	22	9	2	11	4	22	2	3	1	2	2	119
Population structure group	Q1	5	11	3	0	0	0	0	0	0	0	0	0	19
	Q2	6	3	0	1	9	2	9	2	2	0	2	2	38
	Q3	28	8	6	1	2	2	13	0	1	1	0	0	62
	Total	39	22	9	2	11	4	22	2	3	1	2	2	119
PCA analysis group	S1	5	9	5	0	0	0	1	0	0	0	0	0	20
	S2	8	2	0	1	9	2	9	2	3	0	2	2	40
	S3	26	11	4	1	2	2	12	0	0	1	0	0	59
	Total	39	22	9	2	11	4	22	2	3	1	2	2	119
Flower group	White-flowered	8	6	6	0	4	1	17	0	0	0	0	0	42
	Compound-flowered	21	3	1	0	6	1	4	2	3	1	2	2	46
	Red-flowered	1	11	0	1	1	2	0	0	0	0	0	0	16
	Pink-flowered	5	1	2	1	0	0	0	0	0	0	0	0	9
	Yellow and pink flowered	3	1	0	0	0	0	0	0	0	0	0	0	4
	Double flowered	1	0	0	0	0	0	1	0	0	0	0	0	2
	Total	39	22	9	2	11	4	22	2	3	1	2	2	119

## Sheet: Table S8
Table S8 The inferred groups of 119 X. sorbifolium germplasms based on population structure analysis, phylogenetic analysis and PCA analysis
Resequencing No.	Population structure group	Phylogeneti analysis group	PCA analysis group
R04	Q1	G1	S1
R05	Q1	G1	S1
R06	Q1	G1	S1
R07	Q1	G1	S1
R10	Q1	G1	S1
R100	Q1	G1	S1
R105	Q1	G1	S1
R11	Q1	G1	S1
R118	Q1	G1	S1
R13	Q1	G1	S1
R16	Q1	G1	S3
R17	Q1	G1	S1
R18	Q1	G1	S1
R26	Q1	G1	S1
R40	Q1	G1	S1
R73	Q1	G1	S1
R74	Q1	G1	S1
R78	Q1	G1	S1
R97	Q1	G1	S1
R01	Q2	G2	S2
R02	Q2	G3	S3
R08	Q2	G2	S2
R102	Q2	G2	S2
R104	Q2	G2	S2
R106	Q2	G2	S2
R107	Q2	G2	S2
R108	Q2	G2	S2
R109	Q2	G2	S2
R110	Q2	G2	S2
R111	Q2	G2	S2
R113	Q2	G2	S2
R114	Q2	G2	S2
R116	Q2	G2	S2
R117	Q2	G2	S2
R21	Q2	G3	S2
R33	Q2	G2	S2
R43	Q2	G2	S2
R44	Q2	G2	S2
R46	Q2	G2	S2
R48	Q2	G2	S2
R51	Q2	G2	S2
R52	Q2	G3	S2
R53	Q2	G2	S2
R60	Q2	G2	S2
R61	Q2	G2	S2
R63	Q2	G2	S2
R69	Q2	G2	S2
R70	Q2	G2	S2
R71	Q2	G2	S2
R79	Q2	G2	S2
R81	Q2	G2	S2
R84	Q2	G2	S2
R86	Q2	G2	S2
R87	Q2	G2	S2
R91	Q2	G2	S2
R92	Q2	G2	S2
R93	Q2	G2	S2
R03	Q3	G1	S3
R09	Q3	G1	S3
R101	Q3	G2	S3
R103	Q3	G1	S3
R112	Q3	G3	S2
R115	Q3	G1	S3
R12	Q3	G1	S3
R120	Q3	G2	S3
R14	Q3	G1	S3
R15	Q3	G3	S3
R19	Q3	G1	S3
R20	Q3	G1	S3
R22	Q3	G3	S3
R23	Q3	G3	S3
R24	Q3	G1	S3
R25	Q3	G3	S3
R27	Q3	G1	S3
R28	Q3	G3	S3
R29	Q3	G3	S3
R30	Q3	G3	S3
R31	Q3	G2	S3
R32	Q3	G3	S3
R34	Q3	G2	S3
R35	Q3	G1	S3
R36	Q3	G2	S3
R37	Q3	G2	S3
R38	Q3	G2	S3
R39	Q3	G1	S3
R41	Q3	G1	S3
R42	Q3	G1	S3
R45	Q3	G3	S3
R47	Q3	G2	S3
R49	Q3	G3	S3
R50	Q3	G3	S3
R54	Q3	G2	S3
R55	Q3	G3	S3
R56	Q3	G3	S3
R57	Q3	G3	S3
R58	Q3	G3	S3
R59	Q3	G2	S3
R62	Q3	G3	S2
R64	Q3	G3	S3
R65	Q3	G3	S3
R66	Q3	G3	S3
R67	Q3	G3	S3
R68	Q3	G3	S3
R72	Q3	G2	S2
R75	Q3	G1	S3
R76	Q3	G3	S3
R77	Q3	G1	S2
R80	Q3	G3	S2
R82	Q3	G1	S3
R83	Q3	G1	S3
R85	Q3	G3	S3
R88	Q3	G2	S3
R89	Q3	G3	S2
R90	Q3	G1	S3
R94	Q3	G2	S3
R95	Q3	G1	S3
R96	Q3	G2	S3
R98	Q3	G1	S3
R99	Q3	G3	S3
corresponding No.	119	81	111
corresponding/%	100	68.0672	93.2773

## Sheet: Table S9
Table S9 The genetic groups among 35 core collection germplasms of X. sorbifolium by principal component analysis
Core collection	PC1	PC2	PC3	PC4	PC5	PC6	PC7	PC8	PC9	PC10
R08	-0.2127	-0.1669	0.0749	-0.2349	-0.0587	-0.1804	-0.5254	0.2215	0.0464	-0.0148
R10	0.2308	0.0998	-0.3508	0.0166	-0.0374	-0.2255	-0.0569	0.0055	-0.1931	-0.0257
R103	0.1722	0.0059	0.0502	-0.0512	-0.0463	0.2083	-0.1391	-0.1594	0.1694	0.3656
R104	-0.111	-0.0531	0.05	-0.3074	0.1412	0.0418	0.0204	-0.1019	0.0005	0.3205
R106	-0.1312	-0.0019	-0.092	-0.2668	0.0171	-0.0729	-0.1186	0.3404	-0.0487	0.0834
R107	-0.1702	-0.0893	-0.0025	-0.1784	-0.221	0.1404	-0.0916	-0.156	-0.008	-0.2563
R109	-0.0871	-0.0963	0.1111	-0.1928	-0.1158	-0.0296	0.0265	-0.2243	0.0579	-0.2791
R11	0.1983	0.0251	-0.1018	-0.0953	-0.2174	0.0893	0.3147	-0.0766	0.3032	-0.0298
R111	-0.0832	-0.1113	0.1376	-0.133	0.0305	-0.1037	-0.1178	0.1662	0.209	-0.2115
R113	-0.2025	-0.1795	-0.0977	0.3766	-0.0902	-0.0122	0.0174	0.0205	0.0643	0.0872
R17	0.1664	0.0708	-0.4705	-0.0729	0.0903	0.0198	0.0138	0.052	0.106	-0.207
R18	0.2366	0.033	-0.0904	-0.0253	-0.1181	0.1416	0.117	0.0499	0.3263	0.0459
R21	-0.1396	0.101	-0.0466	-0.022	-0.0121	0.1374	0.0441	0.0986	0.0187	-0.2283
R22	0.0665	-0.05	0.113	0.1791	0.1407	-0.1697	-0.08	-0.3232	0.067	-0.1908
R25	0.09	0.0511	0.0801	0.1175	0.3603	0.3519	-0.2534	-0.079	-0.0217	-0.1429
R32	0.186	-0.0355	0.1562	0.0257	0.3156	0.1498	0.119	0.1641	0.1017	0.0587
R33	-0.1914	-0.1748	-0.1355	0.3917	-0.1686	0.0468	0.0158	0.1189	0.0075	0.017
R34	0.1657	-0.0336	0.2885	0.1598	0.0343	-0.1456	0.0806	0.02	0.1867	-0.0194
R41	0.2218	0.0496	0.0992	0.0323	-0.2364	0.2336	-0.1719	-0.1117	-0.2311	0.1716
R42	0.2175	0.0327	0.0086	0.0122	-0.3003	-0.1217	-0.2173	-0.0564	-0.2442	0.2134
R46	-0.1387	0.0577	0.0619	-0.243	0.0563	0.1271	0.3072	0.2811	0.0416	0.0038
R52	-0.1302	-0.0632	0.0024	0.1358	0.2133	-0.3236	0.1361	-0.1889	0.0191	0.0124
R59	0.1847	-0.0332	0.3179	0.0272	0.0299	-0.05	0.1772	0.2691	-0.0692	-0.1116
R62	0.0745	-0.0374	-0.0277	0.1709	0.3906	0.228	-0.2845	0.055	-0.052	0.0131
R70	-0.1342	-0.142	-0.0083	-0.0879	0.0449	0.0728	0.1537	-0.04	-0.2276	0.1607
R71	-0.2383	0.603	0.0681	0.0852	-0.0222	-0.0356	-0.0108	-0.0323	0.0148	0.0489
R73	0.1577	0.0552	-0.4532	-0.0897	0.1765	-0.1501	0.0045	0.0349	-0.1364	-0.1062
R80	0.0551	-0.0465	0.1552	0.0571	0.1467	-0.4019	0.1176	-0.0618	-0.2079	-0.0387
R81	-0.1887	-0.1513	-0.0954	0.1896	-0.1372	0.1821	0.0669	0.1033	-0.079	0.0344
R84	-0.1975	-0.1558	-0.1084	0.2553	-0.0947	0.065	0.1022	0.0698	0.0145	0.0676
R87	-0.0867	-0.0785	-0.0048	-0.1425	-0.0821	0.0493	-0.0466	-0.471	0.1319	-0.1494
R88	0.2288	0.026	0.1078	0.0625	-0.2218	-0.2901	-0.1217	0.1808	0.2485	0.1332
R91	-0.2412	0.6085	0.0685	0.0868	-0.022	-0.0338	-0.0105	-0.0316	0.016	0.0454
R93	-0.1181	-0.1258	-0.0628	-0.1916	0.1879	-0.0844	0.2266	-0.1906	-0.0972	0.393
R99	0.1498	0.0068	0.1971	-0.0474	-0.1737	0.1459	0.1851	0.0529	-0.5351	-0.2642

## Sheet: Table S10
Table S10 A comparison of allele numbers generated in total collection vs core collection
States	AA	TT	CC	GG	AG	CT	AC	GT	CG	AT	N
All	21033118	20907642	26808092	26866231	5412355	5393811	1414305	1406897	796908	1482092	20177158
Core	5340398	5297842	6660190	6673008	1471399	1464856	384848	382787	217448	406213	4107546
